# Supplementary material for: Rewiring capsule production by CRISPRi-based genetic oscillators demonstrates a functional role of phenotypic variation in pneumococcal-host interactions
Source: PubMed Central journal article supplement (PMC10312626; doi:10.1101/2023.06.03.543575), 2023-06-03
Supplement: media-2.pdf [file media-2.pdf]

**Table S1: Strains and plasmids used in this study**

| Strain | Genotype                                                                                                                                                                                                         | Reference              |
|--------|------------------------------------------------------------------------------------------------------------------------------------------------------------------------------------------------------------------|------------------------|
| VL1    | D39V, Serotype 2 strain                                                                                                                                                                                          | 1                      |
| VL333  | D39V, $\Delta prsI::P_{F6-lacI-tetR}$ ( <i>gen</i> )                                                                                                                                                             | 2                      |
| VL783  | D39V, <i>comC::ery</i>                                                                                                                                                                                           | 3                      |
| VL995  | D39V, <i>AprsI::P<sub>F6-lacI</sub></i> ( <i>gen</i> ), <i>bgaA::P<sub>lac-dCas9sp</sub></i> ( <i>tet</i> ), <i>cil::P<sub>3-luc</sub></i> ( <i>kan</i> ), <i>cep::P<sub>3-sgRNA</sub>luc1</i> ( <i>spc</i> )    | 4                      |
| VL996  | D39V, <i>AprsI::P<sub>F6-lacI</sub></i> ( <i>gen</i> ), <i>bgaA::P<sub>lac-dCas9sp</sub></i> ( <i>tet</i> ), <i>cil::P<sub>3-luc</sub></i> ( <i>kan</i> ), <i>cep::pPEPX</i> ( <i>spc</i> )                      | 4                      |
| VL997  | D39V, $\Delta prsI::P_{F6-lacI}$ ( <i>gen</i> ), <i>bgaA::P<sub>lac-dCas9sp</sub></i> ( <i>tet</i> ), <i>cil::P<sub>3-luc</sub></i> ( <i>kan</i> )                                                               | 4                      |
| VL1998 | DCI23, $\Delta prsI::P_{F6-lacI}$ ( <i>gen</i> ), <i>bgaA::P<sub>lac-dCas9sp</sub></i> ( <i>tet</i> )                                                                                                            | 4                      |
| VL2969 | D39V, $\Delta ply::camR$ , <i>cil::kanR</i>                                                                                                                                                                      | Veening lab collection |
| VL3251 | D39V, <i>AprsI::P<sub>F6-lacI</sub></i> ( <i>gen</i> ), <i>bgaA::P<sub>lac-dCas9sp</sub></i> ( <i>tet</i> ), <i>cil::P<sub>3-luc</sub></i> ( <i>kan</i> ), <i>cep::P<sub>3-BS1-sgRNA</sub>luc</i> ( <i>spc</i> ) | This study             |
| VL3252 | D39V, <i>AprsI::P<sub>F6-lacI</sub></i> ( <i>gen</i> ), <i>bgaA::P<sub>lac-dCas9sp</sub></i> ( <i>tet</i> ), <i>cil::P<sub>3-luc</sub></i> ( <i>kan</i> ), <i>cep::P<sub>3-BS2-sgRNA</sub>luc</i> ( <i>spc</i> ) | This study             |
| VL3253 | D39V, <i>AprsI::P<sub>F6-lacI</sub></i> ( <i>gen</i> ), <i>bgaA::P<sub>lac-dCas9sp</sub></i>                                                                                                                     | This study             |

|        |                                                                                                                                                                                                                                             |                              |
|--------|---------------------------------------------------------------------------------------------------------------------------------------------------------------------------------------------------------------------------------------------|------------------------------|
|        | ( <i>tet</i> ), <i>cil::P<sub>3</sub>-luc (kan)</i> ,<br><i>cep::P<sub>3</sub>- BS3-sgRNA<sub>luc</sub></i><br>( <i>spc</i> )                                                                                                               |                              |
| VL3254 | D39V, <i>Aprs1::P<sub>F6</sub>-lacI</i><br>( <i>gen</i> ), <i>bgaA::P<sub>lac</sub>-dCas9<sub>sp</sub></i><br>( <i>tet</i> ), <i>cil::P<sub>3</sub>-luc (kan)</i> ,<br><i>cep::P<sub>3</sub>- BS4-sgRNA<sub>luc</sub></i><br>( <i>spc</i> ) | This study                   |
| VL3255 | D39V, <i>Aprs1::P<sub>F6</sub>-lacI</i><br>( <i>gen</i> ), <i>bgaA::P<sub>lac</sub>-dCas9<sub>sp</sub></i><br>( <i>tet</i> ), <i>cil::P<sub>3</sub>-luc (kan)</i> ,<br><i>cep::P<sub>3</sub>- BS5-sgRNA<sub>luc</sub></i><br>( <i>spc</i> ) | This study                   |
| VL3256 | D39V, <i>Aprs1::P<sub>F6</sub>-lacI</i><br>( <i>gen</i> ), <i>bgaA::P<sub>lac</sub>-dCas9<sub>sp</sub></i><br>( <i>tet</i> ), <i>cil::P<sub>3</sub>-luc (kan)</i> ,<br><i>cep::P<sub>3</sub>- BS6-sgRNA<sub>luc</sub></i><br>( <i>spc</i> ) | This study                   |
| VL3308 | D39V, <i>Δprs1::P<sub>F6</sub>-lacI-</i><br><i>tetR (gen)</i> , <i>bgaA::P<sub>lac</sub>-</i><br><i>dCas9<sub>sp</sub> (tet)</i>                                                                                                            | This study                   |
| VL3309 | D39V, <i>Δprs1::P<sub>F6</sub>-lacI</i><br>( <i>gen</i> ), <i>zip::P<sub>lac</sub>-</i><br><i>mNeonGreen-opt-TEV-</i><br><i>mScarlet1-opt (spc)</i>                                                                                         | Veening<br>lab<br>collection |
| VL3312 | D39V, <i>Δprs1::P<sub>F6</sub>-lacI</i><br>( <i>gen</i> ), <i>zip::P<sub>lac</sub>-</i><br><i>mNeonGreen-opt-TEV-</i><br><i>mTurquoise2-opt (spc)</i>                                                                                       | Veening<br>lab<br>collection |
| VL3436 | D39V, <i>Δprs1::P<sub>F6</sub>-lacI-</i><br><i>tetR (gen)</i> , <i>bgaA::P<sub>lac</sub>-</i><br><i>dCas9<sub>sp</sub> (tet)</i> , <i>cep::P<sub>3</sub>-</i><br><i>BS3-sgRNA2 (spc)</i>                                                    | This study                   |

|                      |                                                                                                                                                                                                                                                                               |                        |
|----------------------|-------------------------------------------------------------------------------------------------------------------------------------------------------------------------------------------------------------------------------------------------------------------------------|------------------------|
| VL3437               | D39V, <i>AprsI</i> ::P <sub>F6</sub> - <i>lacI-tetR</i> ( <i>gen</i> ), <i>bgaA</i> ::P <sub>lac</sub> - <i>dCas9sp</i> ( <i>tet</i> ), <i>cep</i> ::P <sub>3</sub> -BS6-sgRNA3 ( <i>spc</i> )                                                                                | This study             |
| VL3438               | D39V, <i>AprsI</i> ::P <sub>F6</sub> - <i>lacI-tetR</i> ( <i>gen</i> ), <i>bgaA</i> ::P <sub>lac</sub> - <i>dCas9sp</i> ( <i>tet</i> ), <i>cep</i> ::P <sub>3</sub> -BS2-sgRNA6 ( <i>spc</i> )                                                                                | This study             |
| VL3439               | D39V, <i>AprsI</i> ::P <sub>F6</sub> - <i>lacI-tetR</i> ( <i>gen</i> ), <i>bgaA</i> ::P <sub>lac</sub> - <i>dCas9sp</i> ( <i>tet</i> ),<br><br><i>cep</i> ::P <sub>3</sub> -BS3-sgRNA2 ( <i>spc</i> ), <i>zip</i> ::P <sub>3</sub> -BS2- <i>mNeonGreen-opt</i> ( <i>ery</i> ) | This study             |
| VL3440               | D39V, <i>AprsI</i> ::P <sub>F6</sub> - <i>lacI-tetR</i> ( <i>gen</i> ), <i>bgaA</i> ::P <sub>lac</sub> - <i>dCas9sp</i> ( <i>tet</i> ),<br><br><i>cep</i> ::P <sub>3</sub> -BS3-sgRNA2 ( <i>spc</i> ), <i>zip</i> ::P <sub>3</sub> -BS2- <i>mNeonGreen-opt</i> ( <i>ery</i> ) | This study             |
| VL3441               | D39V, <i>AprsI</i> ::P <sub>F6</sub> - <i>lacI-tetR</i> ( <i>gen</i> ), <i>bgaA</i> ::P <sub>lac</sub> - <i>dCas9sp</i> ( <i>tet</i> ),<br><br><i>cep</i> ::P <sub>3</sub> -BS2-sgRNA6 ( <i>spc</i> ), <i>zip</i> ::P <sub>3</sub> -BS6- <i>mScarletI-opt</i> ( <i>ery</i> )  | This study             |
| VL3660               | D39V, <i>Δcps</i>                                                                                                                                                                                                                                                             | Veening lab collection |
| VL3703               | D39V, P <sub>cps</sub> :: <i>tetM-tetR</i> -P <sub>tet</sub> - <i>cps</i> ( <i>tet</i> )                                                                                                                                                                                      | <sup>2</sup>           |
| VL3746<br>(Strain 1) | D39V, <i>AprsI</i> ::P <sub>F6</sub> - <i>lacI-tetR</i> ( <i>gen</i> ), <i>bgaA</i> ::P <sub>lac</sub> - <i>dCas9sp</i> ( <i>tet</i> ), <i>zip</i> ::P <sub>3</sub> -BS6-sgRNA3-P <sub>3</sub> -BSA2- <i>mNeonGreen-opt</i> ( <i>ery</i> )                                    | This study             |

|                        |                                                                                                                                                                                                                                                                                                                                                                                                                                                                              |            |
|------------------------|------------------------------------------------------------------------------------------------------------------------------------------------------------------------------------------------------------------------------------------------------------------------------------------------------------------------------------------------------------------------------------------------------------------------------------------------------------------------------|------------|
| VL3747<br>(Strain 2)   | D39V, <i>AprsI</i> ::P <sub>F6</sub> - <i>lacI-tetR</i> ( <i>gen</i> ), <i>bgaA</i> ::P <sub>lac</sub> - <i>dCas9sp</i> ( <i>tet</i> ), <i>cep</i> ::P <sub>3</sub> -BS6- <i>mScarletI-opt</i> -P <sub>3</sub> -BS3- <i>sgRNA2</i> ( <i>spc</i> )                                                                                                                                                                                                                            | This study |
| VL3748<br>(Strain 3)   | D39V, <i>AprsI</i> ::P <sub>F6</sub> - <i>lacI-tetR</i> ( <i>gen</i> ), <i>bgaA</i> ::P <sub>lac</sub> - <i>dCas9sp</i> ( <i>tet</i> ), <i>cil</i> ::P <sub>3</sub> -BS3- <i>mTurquoise2-opt</i> -P <sub>tet</sub> -BS2- <i>sgRNA6</i> ( <i>kan</i> )                                                                                                                                                                                                                        | This study |
| VL3749<br>(Strain 4)   | D39V, <i>AprsI</i> ::P <sub>F6</sub> - <i>lacI-tetR</i> ( <i>gen</i> ), <i>bgaA</i> ::P <sub>lac</sub> - <i>dCas9sp</i> ( <i>tet</i> ), <i>cil</i> ::P <sub>3</sub> -BS3- <i>mTurquoise2-opt</i> -P <sub>3</sub> -BS2- <i>sgRNA6</i> ( <i>kan</i> )                                                                                                                                                                                                                          | This study |
| VL3750<br>(Int Strain) | D39V, <i>AprsI</i> ::P <sub>F6</sub> - <i>lacI-tetR</i> ( <i>gen</i> ), <i>bgaA</i> ::P <sub>lac</sub> - <i>dCas9sp</i> ( <i>tet</i> ), <i>zip</i> ::P <sub>3</sub> -BS6- <i>sgRNA3</i> -P <sub>3</sub> -BS2- <i>mNeonGreen-opt</i> ( <i>ery</i> ), <i>cep</i> ::P <sub>3</sub> -BS6- <i>mScarletI-opt</i> -P <sub>3</sub> -BS3- <i>sgRNA2</i> ( <i>spc</i> )                                                                                                                | This study |
| VL3752<br>(Strain 5)   | D39V, <i>AprsI</i> ::P <sub>F6</sub> - <i>lacI-tetR</i> ( <i>gen</i> ), <i>bgaA</i> ::P <sub>lac</sub> - <i>dCas9sp</i> ( <i>tet</i> ), <i>zip</i> ::P <sub>3</sub> -BS6- <i>sgRNA3</i> -P <sub>3</sub> -BS2- <i>mNeonGreen-opt</i> ( <i>ery</i> ), <i>cep</i> ::P <sub>3</sub> -BS6- <i>mScarletI-opt</i> -P <sub>3</sub> -BS3- <i>sgRNA2</i> ( <i>spc</i> ), <i>cil</i> ::P <sub>3</sub> -BS3- <i>mTurquoise2-opt</i> -P <sub>tet</sub> -BS2- <i>sgRNA6</i> ( <i>kan</i> ) | This study |
| VL3753<br>(Strain 6)   | D39V, <i>AprsI</i> ::P <sub>F6</sub> - <i>lacI-tetR</i> ( <i>gen</i> ), <i>bgaA</i> ::P <sub>lac</sub> - <i>dCas9sp</i> ( <i>tet</i> ), <i>zip</i> ::P <sub>3</sub> -BS6- <i>sgRNA3</i> -P <sub>3</sub> -BS2- <i>mNeonGreen-opt</i> ( <i>ery</i> ),                                                                                                                                                                                                                          | This study |

|                            |                                                                                                                                                                                                                                                                                                                                                                                                       |            |
|----------------------------|-------------------------------------------------------------------------------------------------------------------------------------------------------------------------------------------------------------------------------------------------------------------------------------------------------------------------------------------------------------------------------------------------------|------------|
|                            | <i>cep::P<sub>3</sub>-BS6-mScarletI-opt-P<sub>3</sub>-BS3-sgRNA2 (spc)</i> , <i>cil::P<sub>3</sub>-BS3-mTurquoise2-opt-P<sub>3</sub>-BS2-sgRNA6 (kan)</i>                                                                                                                                                                                                                                             |            |
| VL3755<br>(Strain5 +AC)    | D39V, <i>Aprs1::P<sub>F6</sub>-lacI-tetR (gen)</i> , <i>bgaA::Plac-dCas9sp (tet)</i> , <i>zip::P<sub>3</sub>-BS6-sgRNA3-P<sub>3</sub>-BS2-mNeonGreen-opt (ery)</i> , <i>cep::P<sub>3</sub>-BS6-mScarletI-opt-P<sub>3</sub>-BS3-sgRNA2 (spc)</i> , <i>cil::P<sub>3</sub>-BS3-mTurquoise2-opt-P<sub>tet</sub>-BS2-sgRNA6 (kan)</i> , <i>lytA::cat</i> , <i>comC::P<sub>comC</sub>-tmp</i>               | This study |
| VL3757<br>(Strain6 +AC)    | D39V, <i>Aprs1::P<sub>F6</sub>-lacI-tetR (gen)</i> , <i>bgaA::P<sub>lac</sub>-dCas9sp (tet)</i> , <i>zip::P<sub>3</sub>-BS6-sgRNA3-P<sub>3</sub>-BS2-mNeonGreen-opt (ery)</i> , <i>cep::P<sub>3</sub>-BS6-mScarletI-opt-P<sub>3</sub>-BS3-sgRNA2 (spc)</i> , <i>cil::P<sub>3</sub>-BS3-mTurquoise2-opt-P<sub>3</sub>-BS2-sgRNA6 (kan)</i> , <i>lytA::cat</i> , <i>comC::P<sub>comC</sub>-tmp</i>      | This study |
| VL3869<br>(VL3755+del-cps) | D39V, <i>Aprs1::P<sub>F6</sub>-lacI-tetR (gen)</i> , <i>bgaA::Plac-dCas9sp (tet)</i> , <i>zip::P<sub>3</sub>-BS6-sgRNA3-P<sub>3</sub>-BS2-mNeonGreen-opt (ery)</i> , <i>cep::P<sub>3</sub>-BS6-mScarletI-opt-P<sub>3</sub>-BS3-sgRNA2 (spc)</i> , <i>cil::P<sub>3</sub>-BS3-mTurquoise2-opt-P<sub>tet</sub>-BS2-sgRNA6 (kan)</i> , <i>lytA::cat</i> , <i>comC::P<sub>comC</sub>-tmp</i> , <i>Δcps</i> | This study |

|        |                                                                                                                                                                                                                                                                                                  |            |
|--------|--------------------------------------------------------------------------------------------------------------------------------------------------------------------------------------------------------------------------------------------------------------------------------------------------|------------|
| VL3870 | D39V, <i>bgaA::P<sub>lac</sub>-dcas9sp (gen)</i>                                                                                                                                                                                                                                                 | This study |
| VL3872 | D39V, P <sub>cps</sub> :: <i>tetM-tetR-P<sub>3</sub>-BS6-mScarletI-opt-cps (tet)</i>                                                                                                                                                                                                             | This study |
| VL3873 | D39V, P <sub>cps</sub> :: <i>tetM-tetR-P<sub>3</sub>-BssgRNA6-mScarletI-opt-cps (tet)</i> , <i>cep::P<sub>3</sub>-BS3-sgRNA2 (spc)</i>                                                                                                                                                           | This study |
| VL3875 | D39V, P <sub>cps</sub> :: <i>tetM-tetR-P<sub>3</sub>-BS6-mScarletI-opt-cps (tet)</i> , <i>cep::P<sub>3</sub>-BS3-sgRNA2 (spc)</i> , <i>zip::P<sub>3</sub>-BS6-sgRNA3-P<sub>3</sub>-BS2-mNeonGreen-opt (ery)</i>                                                                                  | This study |
| VL3876 | D39V, P <sub>cps</sub> :: <i>tetM-tetR-P<sub>3</sub>-BS6-mScarletI-opt-cps (tet)</i> , <i>cep::P<sub>3</sub>-BS3-sgRNA2 (spc)</i> , <i>zip::P<sub>3</sub>-BS6-sgRNA3-P<sub>3</sub>-BS2-mNeonGreen-opt (ery)</i> , <i>cil::P<sub>3</sub>-BS3-mTurquoise2-opt-P<sub>tet</sub>-BS2-sgRNA6 (kan)</i> | This study |
| VL3877 | D39V, P <sub>cps</sub> :: <i>tetM-tetR-P<sub>3</sub>-BS6-mScarletI-opt-cps (tet)</i> , <i>cep::P<sub>3</sub>-BS3-sgRNA2 (spc)</i> , <i>zip::P<sub>3</sub>-BS6-sgRNA3-P<sub>3</sub>-BS2-mNeonGreen-opt (ery)</i> , <i>cil::P<sub>3</sub>-BS3-mTurquoise2-opt-P<sub>3</sub>-BS2-sgRNA6 (kan)</i>   | This study |
| VL3878 | D39V, P <sub>cps</sub> :: <i>tetM-tetR-P<sub>3</sub>-BS6-mScarletI-opt-cps (tet)</i> , <i>cep::P<sub>3</sub>-BS3-sgRNA2 (spc)</i> , <i>zip::P<sub>3</sub>-</i>                                                                                                                                   | This study |

|        |                                                                                                                                                                                                                                                                                                                                                                                            |                        |
|--------|--------------------------------------------------------------------------------------------------------------------------------------------------------------------------------------------------------------------------------------------------------------------------------------------------------------------------------------------------------------------------------------------|------------------------|
|        | BS6-sgRNA3-P <sub>3</sub> -BS2- <i>mNeonGreen-opt (ery)</i> ,<br><i>cil::P<sub>3</sub>-BS3-mTurquoise2-opt-P<sub>tet</sub>-BS2-sgRNA6 (kan)</i> ,<br><i>bgaA::P<sub>lac</sub>-dCas9sp (gen)</i><br><br>Inducible CAPSULATOR 1.0                                                                                                                                                            |                        |
| VL3879 | D39V, P <sub>cps</sub> :: <i>tetM-tetR-P<sub>3</sub>-BS6-mScarletI-opt-cps (tet)</i> ,<br><i>cep::P<sub>3</sub>-BS3-sgRNA2 (spc)</i> ,<br><i>zip::P<sub>3</sub>-BS6-sgRNA3-P<sub>3</sub>-BS2-mNeonGreen-opt (ery)</i> ,<br><i>cil::P<sub>3</sub>-BS3-mTurquoise2-opt-P<sub>3</sub>-BS2-sgRNA6 (kan)</i> ,<br><i>bgaA::P<sub>lac</sub>-dCas9sp (gen)</i><br><br>Constitutive CAPSULATOR 1.0 | This study             |
| VL3882 | D39V, <i>AprsI::P<sub>F6</sub>-lacI (gen)</i> ,<br><i>zip::tmp-P<sub>lac</sub>-MCS (tmp)</i>                                                                                                                                                                                                                                                                                               | Veening lab collection |
| VL4313 | D39V, <i>zip::P<sub>3</sub>-BS6-sgRNA3-P<sub>3</sub>-BS2-mNeonGreen-opt (ery)</i>                                                                                                                                                                                                                                                                                                          | This study             |
| VL4315 | D39V, <i>zip::P<sub>3</sub>-BS6-sgRNA3-P<sub>3</sub>-BS2-mNeonGreen-opt (ery)</i> ,<br>P <sub>cps</sub> :: <i>tetM-tetR-P<sub>3</sub>-BS6-mScarletI-opt-cps (tet)</i> ,<br><i>cep::P<sub>3</sub>-BS3-sgRNA2 (spc)</i> ,<br><i>bgaA::P<sub>lac</sub>-dCas9-P<sub>3</sub>-BS3-mTurquoise2-opt-P<sub>3</sub>-BS2-sgRNA6 (gen)</i><br><br>CAPSULATOR 2.0                                       | This study             |
| VL4316 | D39V, <i>zip::P<sub>3</sub>-BS6-sgRNA3-P<sub>3</sub>-BS2-mNeonGreen-opt (ery)</i> ,                                                                                                                                                                                                                                                                                                        | This study             |

|        |                                                                                                                                                                                                                                                                                                                                                                                                                        |            |
|--------|------------------------------------------------------------------------------------------------------------------------------------------------------------------------------------------------------------------------------------------------------------------------------------------------------------------------------------------------------------------------------------------------------------------------|------------|
|        | <i>P<sub>cps</sub>::tetM-tetR-P<sub>3</sub>-BS6-mScarletI-opt-Δcps (tet)</i><br>(NO <i>cps</i> )                                                                                                                                                                                                                                                                                                                       |            |
| VL4317 | D39V, <i>zip</i> :: P <sub>3</sub> - BS6-sgRNA3- P <sub>3</sub> -BS2- <i>mNeonGreen-opt (ery)</i> ,<br><i>P<sub>cps</sub>::tetM-tetR-P<sub>3</sub>-BS6-mScarletI-opt-Δcps (tet)</i><br>(NO <i>cps</i> ), <i>cep</i> :: P <sub>3</sub> -BS3-sgRNA2 ( <i>spc</i> )                                                                                                                                                       | This study |
| VL4318 | D39V, <i>zip</i> :: P <sub>3</sub> - BS6-sgRNA3- P <sub>3</sub> -BS2- <i>mNeonGreen-opt (ery)</i> ,<br><i>P<sub>cps</sub>::tetM-tetR-P<sub>3</sub>-BS6-mScarletI-opt-cps (tet)</i>                                                                                                                                                                                                                                     | This study |
| VL4319 | D39V, <i>zip</i> :: P <sub>3</sub> - BS6-sgRNA3- P <sub>3</sub> -BS2- <i>mNeonGreen-opt (ery)</i> ,<br><i>P<sub>cps</sub>::tetM-tetR-P<sub>3</sub>-BS6-mScarletI-opt-cps (tet)</i> ,<br><i>cep</i> :: P <sub>3</sub> -BS3 ( <i>spc</i> ) (NO sgRNA2)                                                                                                                                                                   | This study |
| VL4320 | D39V, <i>zip</i> :: P <sub>3</sub> - BS6-sgRNA3- P <sub>3</sub> -BS2- <i>mNeonGreen-opt (ery)</i> ,<br><i>cep</i> :: P <sub>3</sub> -BS3-sgRNA2 ( <i>spc</i> )                                                                                                                                                                                                                                                         | This study |
| VL4321 | D39V, <i>zip</i> :: P <sub>3</sub> - BS6-sgRNA3- P <sub>3</sub> -BS2- <i>mNeonGreen-opt (ery)</i> ,<br><i>P<sub>cps</sub>::tetM-tetR-P<sub>3</sub>-BS6-mScarletI-opt-Δcps (tet)</i><br>(NO <i>cps</i> ), <i>cep</i> :: P <sub>3</sub> -BS3-sgRNA2 ( <i>spc</i> ), <i>bgaA</i> ::P <sub>lac</sub> -dCas9-P <sub>3</sub> -BS3- <i>mTurquoise2-opt-P<sub>3</sub>-BS2-sgRNA6 (gen)</i><br><br>CAPSU2-Ctl-Delta- <i>cps</i> | This study |



|                |                                                                                                                                                                                                                                                                                                                                                                                                                                 |                        |
|----------------|---------------------------------------------------------------------------------------------------------------------------------------------------------------------------------------------------------------------------------------------------------------------------------------------------------------------------------------------------------------------------------------------------------------------------------|------------------------|
| VL4322         | D39V, <i>zip</i> :: P <sub>3</sub> - BS6-sgRNA3- P <sub>3</sub> -BS2- <i>mNeonGreen-opt (ery)</i> , P <sub>cps</sub> :: <i>tetM-tetR</i> -P <sub>3</sub> -BS6- <i>mScarletI-opt-cps (tet)</i> , <i>cep</i> :: P <sub>3</sub> -BS3 ( <i>spc</i> ) (NO sgRNA2), <i>bgaA</i> ::P <sub>lac</sub> -dCas9-P <sub>3</sub> -BS3- <i>mTurquoise2-opt</i> -P <sub>3</sub> -BS2-sgRNA6 ( <i>gen</i> )<br><br>CAPSU2-Ctl-Always-OFF         | This study             |
| VL4323         | D39V, <i>zip</i> :: P <sub>3</sub> - BS6-sgRNA3- P <sub>3</sub> -BS2- <i>mNeonGreen-opt (ery)</i> , P <sub>cps</sub> :: <i>tetM-tetR</i> -P <sub>3</sub> -BS1- <i>mScarletI-opt-cps (tet)</i> (NO BS6 but BS1), <i>cep</i> :: P <sub>3</sub> -BS3-sgRNA2 ( <i>spc</i> )                                                                                                                                                         | This study             |
| VL4324         | D39V, <i>zip</i> :: P <sub>3</sub> - BS6-sgRNA3-P <sub>3</sub> -BS2- <i>mNeonGreen-opt (ery)</i> , P <sub>cps</sub> :: <i>tetM-tetR</i> -P <sub>3</sub> -BS1- <i>mScarletI-opt-cps (tet)</i> (NO BS6 but BS1), <i>cep</i> ::P <sub>3</sub> -BS3-sgRNA2 ( <i>spc</i> ), <i>bgaA</i> ::P <sub>lac</sub> -dCas9-P <sub>3</sub> -BS3- <i>mTurquoise2-opt</i> -P <sub>3</sub> -BS2-sgRNA6 ( <i>gen</i> )<br><br>CAPSU2-Ctl-Always-ON | This study             |
| <b>Plasmid</b> | <b>Genotype</b>                                                                                                                                                                                                                                                                                                                                                                                                                 | <b>Reference</b>       |
| pVL1305        | pPEPX-P <sub>3</sub> -sgRNA <sub>luc</sub> , <i>spc</i>                                                                                                                                                                                                                                                                                                                                                                         | Veening lab collection |
| pASR102        | pPEPZ-P <sub>lac</sub> , <i>gen</i>                                                                                                                                                                                                                                                                                                                                                                                             | Keller et al           |
| pASR103        | pPEPZ-P <sub>lac</sub> , <i>ery</i> , <i>bla</i>                                                                                                                                                                                                                                                                                                                                                                                | Keller et al           |

|         |                                                        |                              |
|---------|--------------------------------------------------------|------------------------------|
| pASR110 | pPEPZ-P <sub>lac</sub> -mNeonGreen-<br><i>opt, spc</i> | Veening<br>lab<br>collection |
|---------|--------------------------------------------------------|------------------------------|

References:

1. Slager, J., Aprianto, R. & Veening, J.-W. Deep genome annotation of the opportunistic human pathogen *Streptococcus pneumoniae* D39. *Nucleic Acids Res.* **46**, 9971–9989 (2018).
2. Sorg, R. A., Gally, C., Van Maele, L., Sirard, J.-C. & Veening, J.-W. Synthetic gene-regulatory networks in the opportunistic human pathogen *Streptococcus pneumoniae*. *Proc Natl Acad Sci U S A* **117**, 27608–27619 (2020).
3. Moreno-Gómez, S. *et al.* Quorum sensing integrates environmental cues, cell density and cell history to control bacterial competence. *Nat Commun* **8**, 854 (2017).
4. Liu, X. *et al.* High-throughput CRISPRi phenotyping identifies new essential genes in *Streptococcus pneumoniae*. *Mol. Syst. Biol.* **13**, 931 (2017).
